# Supplementary material for: Comparisons between Polarimetric Radio Occultation Measurements with WRF Model Simulation for Tropical Cyclones
Source: Copernicus journal article supplement (doi:10.5194/egusphere-2024-3708), 2025-01-03
Supplement: Supplementary file [file egusphere-2024-3708-AC3-supplement.pdf]

### **Reviewer 3**

#### **Review of “Comparisons between Polarimetric Radio Occultation Measurements with WRF Model Simulation for Tropical Cyclones”**

This manuscript presents a comparative study of three typhoon cases using five different microphysics schemes and two initial conditions (ICs), validated against polarimetric radio occultation (PRO), conventional radio occultation (RO) retrievals, and radiosonde data. The results highlight the unique capabilities of PRO in capturing hydrometeor structures, offering valuable insights for evaluating microphysics schemes.

Overall, the paper is well written and clearly structured. The language is easy to follow, and there are no major grammatical issues. The topic is timely and relevant, and the use of PRO for model evaluation is an important and innovative direction.

However, I have several concerns that need to be addressed before the paper can be considered for publication:

We thank the reviewer for the valuable feedback. We have carefully addressed all concerns and revised the manuscript accordingly. Detailed responses are provided below in blue. We appreciate your thoughtful review.

#### **1. Use and Interpretation of Initial Conditions (ICs):**

The manuscript does not clearly articulate the purpose and implications of the two different initial conditions. While it is acknowledged that ICs can influence microphysics scheme performance, the two ICs used in this study (ERA5 and FNL) are significantly different even before considering the influence of microphysics as stated in the paper. The author used ERA5 to verify the results but didn't provide independent verification of typhoon intensity and track (e.g., best track data or satellite-derived observations), therefore it is difficult to assess which combination of IC and microphysics performs better against observations. Besides, ERA5 is a reanalysis product that is not truly independent of the model, which weakens its role as a verification dataset. In its current form, the IC study part lacks a clear scientific objective or demonstrated relevance to the overall goals of the study, and its inclusion is difficult to justify without more thorough validation.

We appreciate the reviewer's comment regarding the role of initial conditions (ICs) in this study. Both ERA5 and NCEP FNL datasets were used as ICs to assess whether uncertainties in the microphysics schemes persist across different initial conditions. NCEP FNL is a widely used IC dataset for regional weather models. ERA5, on the other hand, assimilates a large amount of observational data and is regarded as one of the

most accurate estimates of the atmospheric state (e.g., Beck et al., 2022; Sheridan et al., 2020). It also serves as an alternative option for evaluating the uncertainty associated with microphysics schemes. Additional descriptions clarifying the purpose of using two different initial conditions have been added to the revised manuscript.

Regarding the independent verification, we conducted comparisons between the WRF simulations and the infrared satellite imagery, as shown in Fig. R3-1. A similar comparison for the ERA5\_Bualoi\_Goddard simulation was presented in Fig. 7 of the original manuscript. Among the five simulations using different microphysics schemes, ERA5\_Bualoi\_Goddard exhibits a pattern most consistent with the satellite observations (Fig. R3-1). In contrast, the patterns produced by the other schemes appear either too weak and disorganized (e.g., Purdue Lin, WSM6, Thompson) or overly intense and exaggerated (e.g., Morrison), showing less resemblance to the satellite observations. Fig. 7 in the original manuscript has been replaced with Fig. R3-1 to provide a more comprehensive comparison.

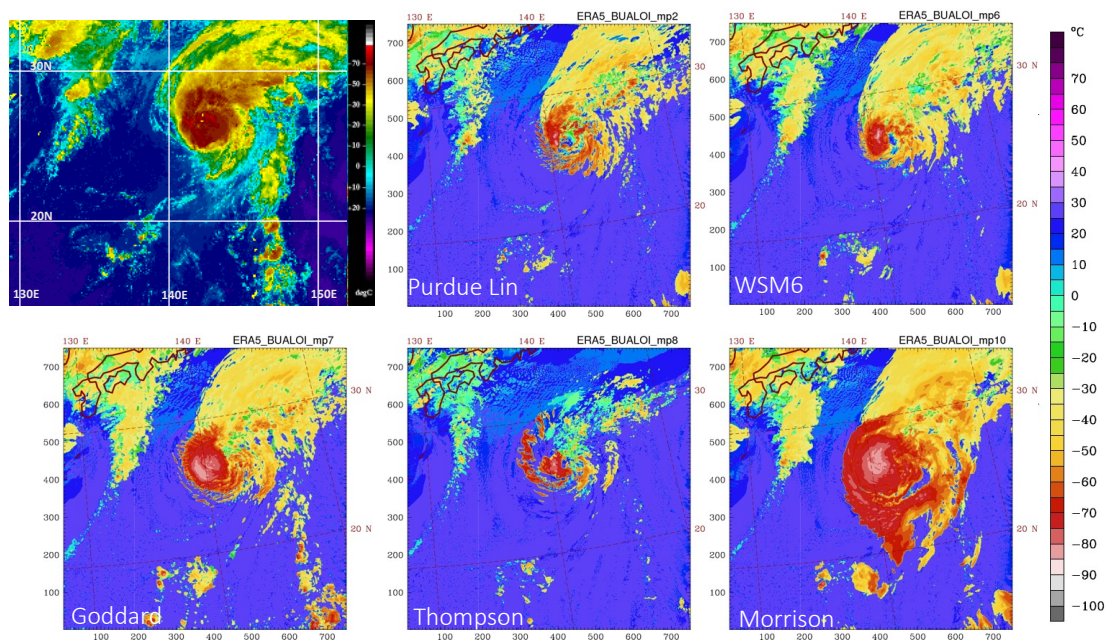

Fig. R3-1. The upper panels from left to right are the infrared satellite image with NHC enhancement, adopted from the Cooperative Institute for Meteorological Satellite Studies/University of Wisconsin-Madison (CIMSS), for Typhoon Bualoi at 2230 UTC on 23 Oct. 2019; the 16-h forecast (i.e., 2200 UTC 23 Oct.) cloud top temperature for typhoon Bualoi with the Purdue\_Lin and WSM6 microphysics and the initial condition from ERA5. The bottom panels from left to right are the same but for the cloud top temperature with the Goddard, Thompson, and Morrison microphysics.

In addition, we include the simulations of typhoon tracks for all simulation cases (Fig. R3-2) to address the reviewer's concern regarding verification. Under the same initial condition (either NCEP FNL or ERA5), the simulated typhoon tracks using different microphysics schemes exhibit high similarity, indicating a relatively weak

sensitivity of track prediction to microphysics schemes. However, the use of different initial conditions leads to a clear bifurcation in the track patterns, forming two distinct groups corresponding to the two IC datasets. An exception is found in ERA5\_Matmo\_WSM6, which shows a significantly deviated track compared to the others (Fig. R3-2b).

The analysis of track and intensity errors reveals that most simulated tracks exhibit errors of less than 100 km during the 18-hour forecasts, and the simulated sea-level pressure generally deviates by less than 12 hPa, except for the Bualoi cases. Typhoon Bualoi exhibited stronger development and had a maximum intensity of 935 hPa at the initial time. The simulations with ERA5 IC have a weak intensity at the beginning, resulting in larger intensity errors across all experiments (Fig. R3-3b). To average across the three typhoon cases, Fig. R3-4 presents the mean track and intensity errors. Among all the microphysics schemes, the Goddard scheme generally yields smaller track errors, regardless of the initial condition used (Fig. R3-4a). However, it shows a larger mean intensity error in simulations initialized with ERA5 (Fig. R3-4b). Overall, no consistent pattern emerges to indicate that one IC-microphysics combination outperforms others across all metrics. Therefore, it is difficult to isolate which factor (initial condition or microphysics) has the greatest impact solely based on track or intensity verification.

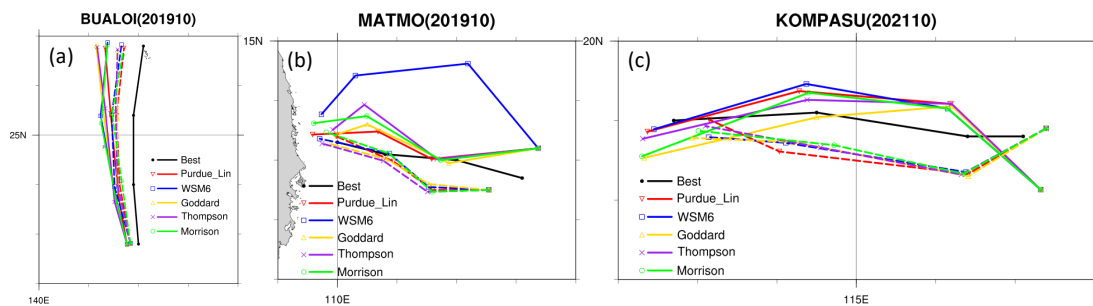

Fig. R3-2. Simulated tracks over time for Typhoons (a) Bualoi, (b) Matmo, and (c) Kompasu. The best track from JTWC is shown as a black line. Solid lines represent simulations with ERA5 initial conditions, while dashed lines represent those with NCEP FNL initial conditions. Lines in different colors represent different microphysics schemes.

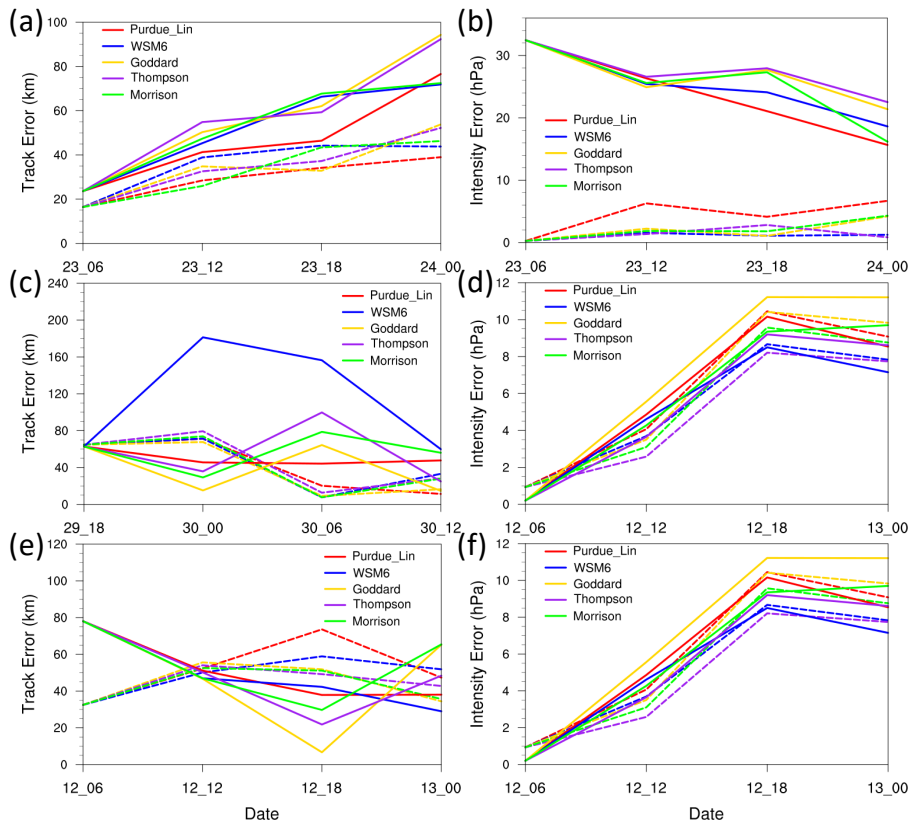

Fig. R3-3. Simulated (a) track and (b) intensity errors over time for Typhoon Bualoi. The best track data are from JTWC. Solid lines represent experiments with ERA5 initial conditions, while dashed lines represent those with NCEP FNL initial conditions. Lines in different colors represent different microphysics schemes. Panels (c) and (d), and (e) and (f) show the same variables as (a) and (b), but for Typhoon Matmo and Typhoon Kompasu, respectively.

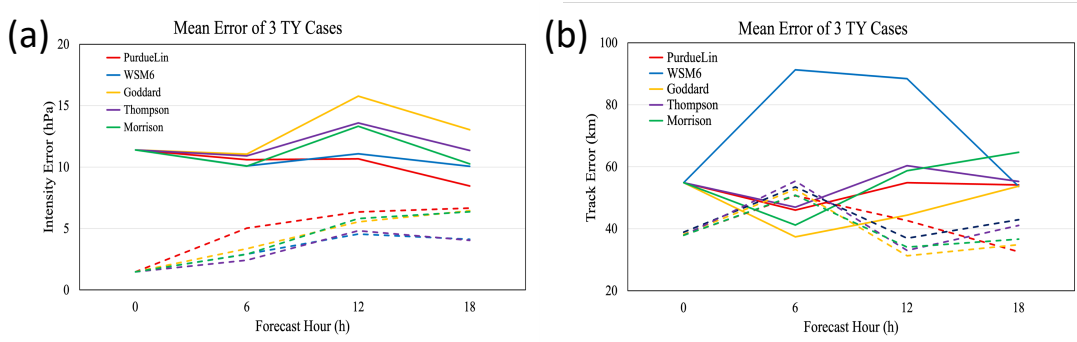

Fig. R3-4. The averaged (a) track errors and (b) intensity errors, respectively, from all three typhoon cases. Solid lines represent simulations with ERA5 initial conditions, while dashed lines represent those with NCEP FNL initial conditions. Lines in different colors represent different microphysics schemes.

## Reference:

Beck, H. E., A. I. J. M. van Dijk, P. R. Larraondo, T. R. McVicar, M. Pan, E. Dutra, and D. G. Miralles, 2022: MSWX: Global 3-Hourly  $0.1^\circ$  Bias-Corrected

Meteorological Data Including Near-Real-Time Updates and Forecast Ensembles. *Bull. Amer. Meteor. Soc.*, **103**, E710–E732, <https://doi.org/10.1175/BAMS-D-21-0145.1>.

Sheridan, S. C., C. C. Lee, and E. T. Smith, 2020: A comparison between station observations and reanalysis data in the identification of extreme temperature events. *Geophys. Res. Lett.*, **47**, e2020GL088120, <http://doi.org/10.1029/2020GL088120>.

## 2. Use of RO Retrievals as Verification:

The study treats RO temperature and moisture retrievals similarly to radiosonde data. However, this assumption is problematic for several reasons:

- RO retrievals are often derived using a priori information from climatology or model fields, which compromises their use as independent observational data.
- RO measurements are inherently integrated along ray paths, similar to PRO, and thus are not directly equivalent to point measurements like radiosondes.
- The comparison would be more meaningful if the model outputs were validated against rawer RO observables, such as bending angle. Although these raw RO quantities may not provide hydrometeor information like PRO, they are more suitable for comparing the thermodynamic structure along the ray path and could complement the PRO analysis. This important aspect seems to be overlooked, limiting the insightfulness of the comparisons shown in Section 3.

Thank you for this insightful comment. We agree that RO temperature and moisture retrievals are not equivalent to radiosonde measurements, as they incorporate a priori information, which may compromise their independence. However, the quality of RO retrievals has been extensively validated in previous studies, demonstrating strong consistency with radiosonde observations, particularly for temperature (e.g., Wee et al., 2020; Zhang et al., 2024). Therefore, we consider it acceptable to use RO retrievals as a reference for model verification in certain contexts.

In response to the reviewer's concern, we have conducted a complementary comparison using RO refractivity, as shown in Fig. R3-5. While the RO bending angle is a more fundamental measurement than refractivity, deriving simulated bending angles requires extrapolation beyond the model top, which may introduce additional uncertainties. To avoid this issue, we apply a local refractivity forward operator to compute model refractivity, which can be directly compared with observed RO refractivity profiles. The results shown in Fig. R3-5 exhibit a variation pattern consistent with that in water vapor mixing ratio (Fig. 5b). We believe this enhances the robustness of our model



evaluation by providing a more appropriate comparison with raw RO observables. The description of RO refractivity verification has been added to the revised manuscript.

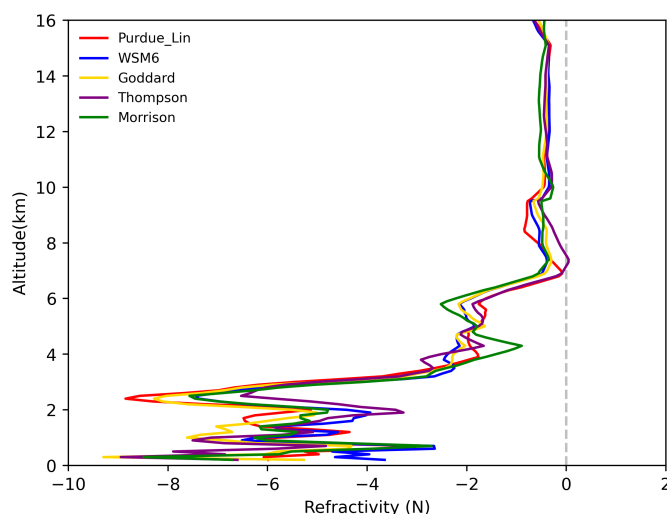

Fig. R3-5. The mean differences for verifications against RO refractivity across all simulations. The red curve represents the Purdue\_Lin scheme, blue represents WSM6, yellow represents Goddard, purple represents Thompson, and green represents the Morrison scheme.

#### Reference:

Wee, T. K., R. A. Anthes, D. C. Hunt, W. S. Schreiner, and Y. H. Kuo, 2022: Atmospheric GNSS RO 1D-Var in use at UCAR: Description and validation. *Remote Sensing*, **14**(21), 5614. <https://doi.org/10.3390/rs14215614>

Zhang, Z., T. Xu, N. Wang, F. Gao, S. Li, and L. Bastos, 2024: Evaluation of the retrieved temperature and specific humidity from COSMIC-2 and FY-3D with radiosonde, reanalysis data, and MetOp. *Measurement*, **235**, 114936. <https://doi.org/10.1016/j.measurement.2024.114936>

### 3. PRO Verification and Typhoon Structure Alignment:

The use of PRO for typhoon evaluation is promising, but the manuscript does not sufficiently address potential misalignment between observed and simulated typhoon structures. While center relocation is applied to correct for gross displacement, finer structural differences—such as asymmetries in precipitation bands or peripheral wind fields—are crucial for accurate PRO comparisons. Unlike atmospheric rivers (ARs), typhoons are highly sensitive to orientation and mesoscale features. If the PRO ray trajectory does not intersect the simulated hydrometeor regions properly, it can lead to misleading differences, regardless of microphysics scheme performance.

For example, in Figure 6, Purdue Lin and WSM6 show narrower hydrometeor regions

compared to the other schemes. Is this due to genuine model differences, or a result of misalignment between PRO ray paths and the simulated storm structures? The paper would greatly benefit from incorporating additional observational data (e.g., precipitation from satellite sensors) to independently verify which simulations better match reality. This would help determine whether PRO is truly capturing physical differences among the MP schemes, or whether spatial mismatches are driving the observed discrepancies.

We agree with the reviewer that center relocation alone may not fully resolve the spatial misalignment between observed and simulated typhoon structures. As shown in Fig. R3-1, the cloud structures of different microphysical schemes may differ significantly. To address this issue and better account for fine-scale structural discrepancies, we have implemented an enhanced approach in the revised manuscript. Specifically, in addition to the primary relocated ray path, we include two supplementary ray paths offset by  $\pm 0.5$  degrees (depending on the ray orientation). We then compute the phase shift delay ( $\Delta\phi$ ) along all three ray paths and use the averaged value as the representative  $\Delta\phi$  for comparison with the PRO observations.

This approach helps mitigate the effects of minor misalignments between the observed and simulated storm structures, particularly in highly asymmetric systems such as typhoons. Accordingly, Figures 6, 8, and 12 in the revised manuscript have been updated to reflect the averaged  $\Delta\phi$  values derived from this three-ray-path method. We believe this modification enhances the robustness of the PRO-based verification and provides a more reliable evaluation of microphysics scheme performance.

### **Conclusion:**

This study has strong potential to make a significant contribution to the field. The use of PRO for evaluating typhoon simulations is novel and valuable. However, the current manuscript does not fully address the limitations of its verification strategy, particularly with respect to the IC interpretation, RO data usage, and structural alignment in PRO comparisons. Addressing these issues would strengthen the scientific rigor and impact of the work.

I encourage the authors to further develop the analysis, especially around item (3), and to consider incorporating additional independent observations to support the conclusions.

We sincerely thank the reviewer for the encouraging remarks and constructive suggestions. We appreciate the recognition of the novelty and potential value of using PRO for typhoon simulation evaluation. In response to the reviewer's concerns, as

mentioned in the replies above, we have carefully revised the manuscript to improve the scientific rigor of our verification strategy. We hope these revisions and clarifications adequately address the reviewer's concerns and strengthen the contribution of this study.
